# Supplementary material for: Microplastic Has No Effect on Rice Yield and Gaseous N Emission from an Infertile Soil with High Inorganic N Inputs
Source: MDPI journal article supplement (doi:10.3390/plants13091279), 2024-05-06
Supplement: s1 [file s1]

## Supplementary Materials:

**Table S1:** Effects of microplastic polyethylene (PE) on the ammonia (NH<sub>3</sub>) volatilization from paddy soil planted with common rice cultivar Nangeng 55 (NG) and hybrid rice cultivar Jiafengyou 6 (JFY).

| Treatment | Cumulative NH <sub>3</sub> volatilizations (g N pot <sup>-1</sup> ) |                                       |                                        |
|-----------|---------------------------------------------------------------------|---------------------------------------|----------------------------------------|
|           | Basal fertilization                                                 | The first supplementary fertilization | The second supplementary fertilization |
| NG        | 0.30±0.08 a                                                         | 0.28±0.05 a                           | 0.35±0.15 a                            |
| NG+PE     | 0.25±0.13 a                                                         | 0.31±0.07 a                           | 0.28±0.12 a                            |
| JFY       | 0.30±0.07 a                                                         | 0.24±0.10 a                           | 0.11±0.03 b                            |
| JFY+PE    | 0.28±0.14 a                                                         | 0.28±0.07 a                           | 0.11±0.03 b                            |

Note: Data are presented as mean±SD (*n* = 3). Different lowercase letters within each column indicate the differences among treatments are significant at *p* < 0.05.

**Table S2:** Effects of microplastic polyethylene (PE) addition on mean pH of floodwater observed after each application of inorganic nitrogen fertilizer urea

| Treatment | Basal fertilization | First supplementary fertilization | Second supplementary fertilization |
|-----------|---------------------|-----------------------------------|------------------------------------|
|           |                     |                                   |                                    |
| NG        | 8.09 ± 0.21 a       | 8.33 ± 0.21 a                     | 8.49 ± 0.21 a                      |
| NG+PE     | 7.96 ± 0.23 a       | 8.48 ± 0.28 a                     | 8.47 ± 0.25 a                      |
| JFY       | 8.16 ± 0.17 a       | 8.40 ± 0.15 a                     | 8.37 ± 0.25 a                      |
| JFY+PE    | 8.23 ± 0.16 a       | 8.48 ± 0.31 a                     | 8.21 ± 0.15 a                      |

Note: NG, the common rice cultivar Nangeng 5055; JFY, the hybrid rice cultivar Jiafengyou 6. Data are presented as mean ± SD (*n* = 3). Data within each column followed by the same lowercase letter are not significantly different at *p* < 0.05.
